# Supplementary material
Source: Royal Society of Chemistry journal article supplement (doi:10.1039/d6ra02059c)
Supplement: d6ra02059c1.pdf [file d6ra02059c1.pdf]

## Supplementary Information

### **Anion-Dependent Electrochemical Capacitive Behavior of Biomass-Derived Activated Carbon in Imidazolium Ionic Liquid Electrolytes**

Maharun Negar Mojumder<sup>1</sup>, Rana Sheikh<sup>1</sup>, Amir Hamza<sup>1</sup>, Akter Hossain Reaz<sup>1,2</sup>, Md Rahamatolla<sup>1</sup>, Sanjay Belowar<sup>1</sup>, Roy Sudipto Prattaya<sup>1</sup>, Abdur Rahim<sup>3</sup>, Shimul Saha<sup>1\*</sup> and Chanchal Kumar Roy<sup>1\*</sup>

<sup>1</sup>*Department of Chemistry, Bangladesh University of Engineering and Technology (BUET), Dhaka 1000, Bangladesh*

<sup>2</sup>*Department of Chemistry, Michigan State University, Michigan- 48824, USA*

<sup>3</sup>*Institute of Energy Research and Development (IERD), Bangladesh Council of Scientific and Industrial Research (BCSIR), Dhanmondi, Dhaka-1205, Bangladesh*

Corresponding Authors

\*ckroy@chem.buet.ac.bd (CKR)

\*shimul@chem.buet.ac.bd (SS)

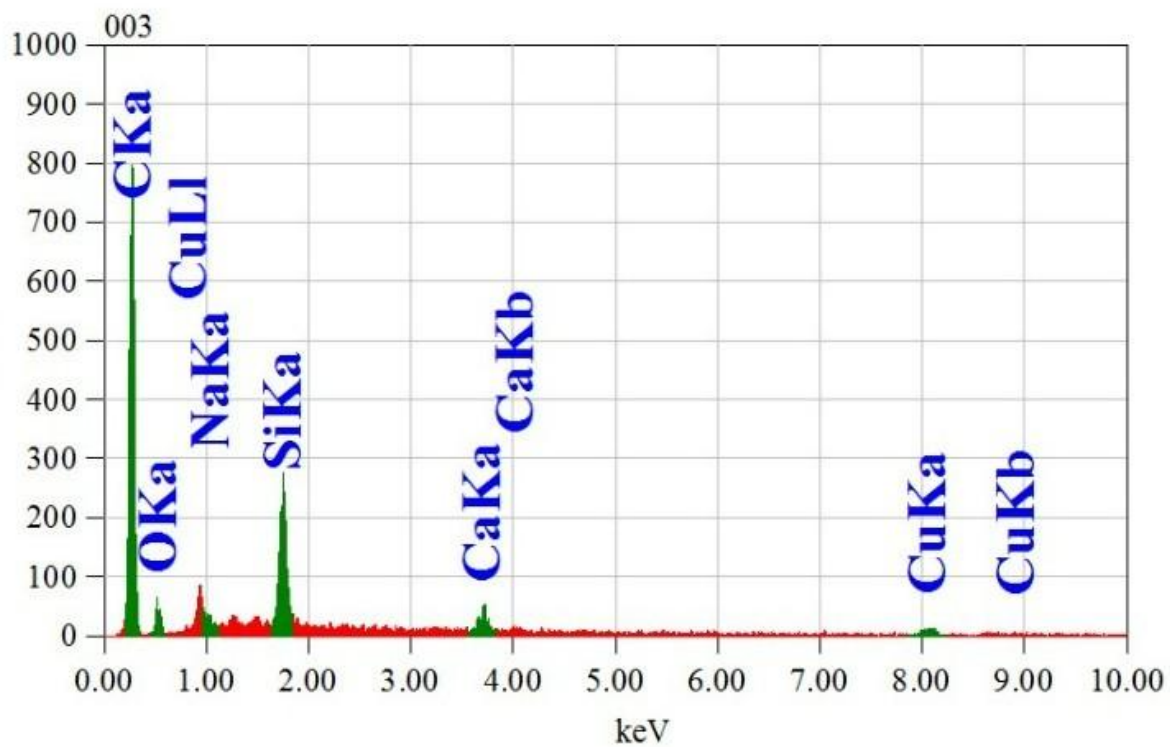

**Figure S1.** EDS spectrum of banana leaf-derived AC.

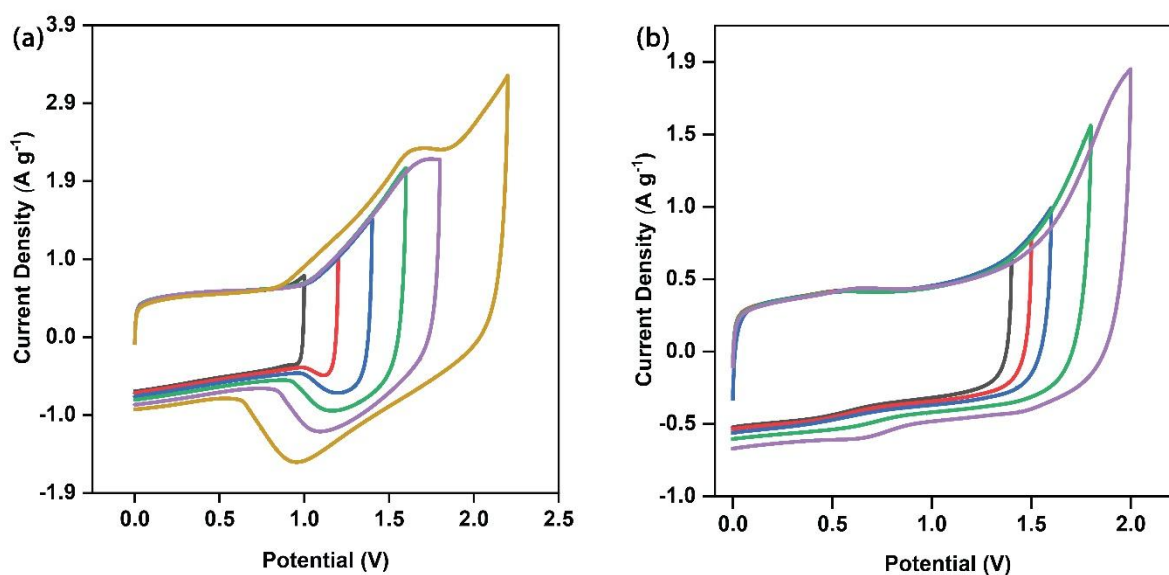

**Figure S2.** CV curves of AC at different potential windows in (a) bmim[Br] and (b) bmim[Cl] electrolytes at 20 mV s<sup>-1</sup>

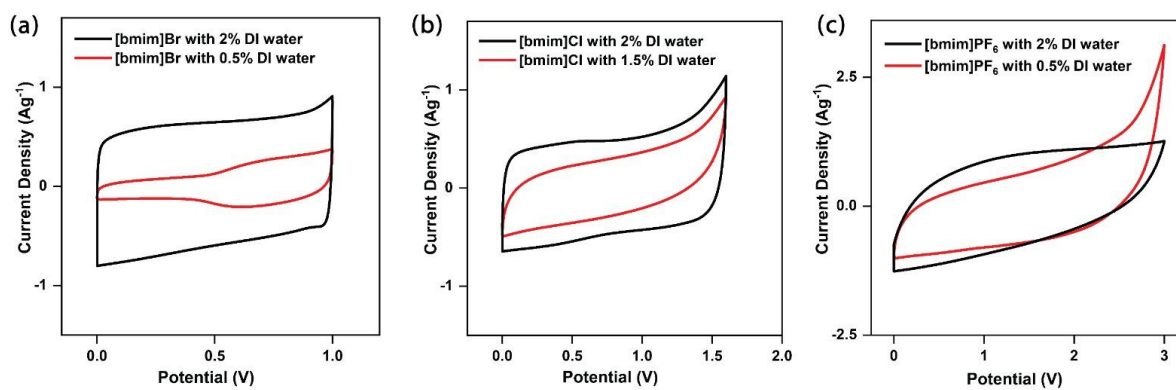

**Figure S3:** Comparison of CVs of (a) [bmim]Br, (b) [bmim]Cl, and (c) [bmim]PF<sub>6</sub> electrolytes at the scan rate of 20 mVs<sup>-1</sup> under ambient moisture condition and after the addition of 2 wt% water in a symmetric two-electrode configuration.

**Table S1.** Electrochemical impedance parameters obtained from equivalent circuit fitting of Nyquist plots for banana-leaf-derived AC in different IL electrolytes.

| Electrolyte (ILs)     | $R_s$ ( $\Omega$ ) | $R_{ct}$ ( $\Omega$ ) |
|-----------------------|--------------------|-----------------------|
| [bmim]Br              | 9.01               | 1.68                  |
| [bmim]Cl              | 16.22              | 1.73                  |
| [bmim]PF <sub>6</sub> | 98.56              | 57.84                 |
